# Supplementary material for: Excision ofHelitronTransposons in Maize
Source: Oxford University Press journal article supplement (doi:10.1534/genetics.109.101527), 2009-03-03
Supplement: 101527_si.pdf [file 101527_si.pdf]

# GENETICS

## Supporting Information

<http://www.genetics.org/cgi/content/full/genetics.109.101527/DC1>

Note

### Excision of *Helitron* Transposons in Maize

Yubin Li and Hugo K. Dooner

Copyright © 2009 by the Genetics Society of America  
doi:10.1534/genetics.109.101527

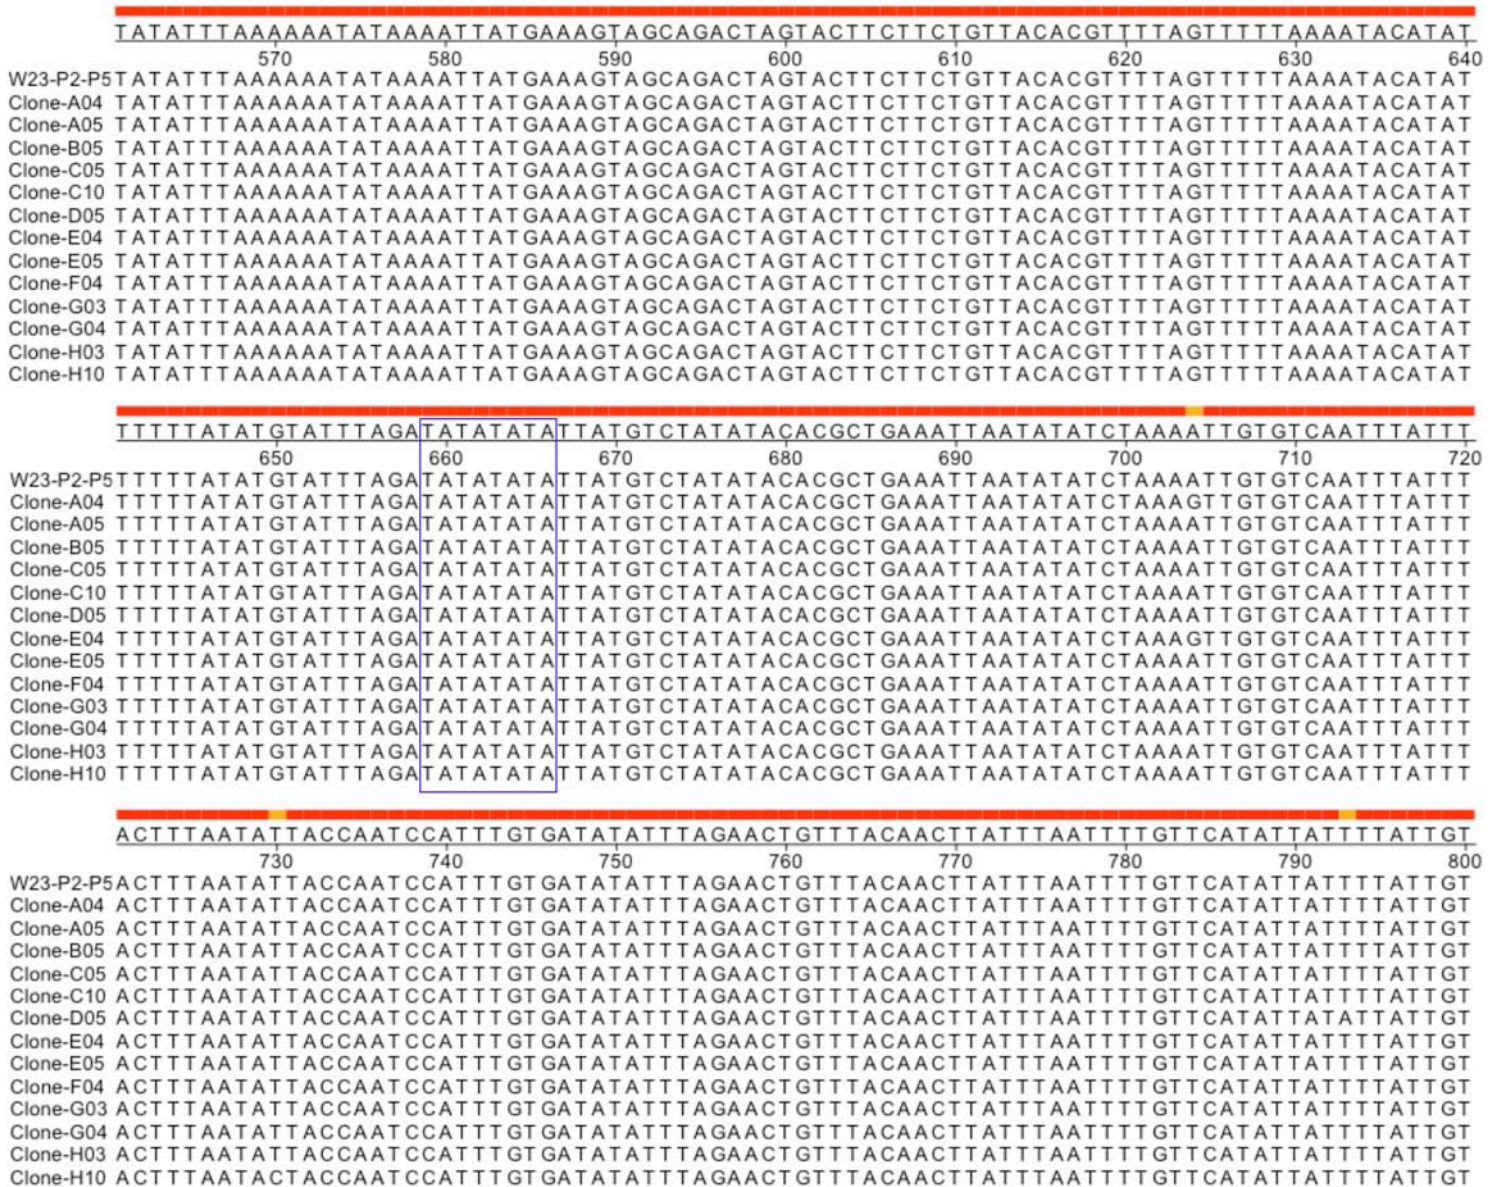

Figure S1.— No TA repeat variation detected at the W23 *HelA2* vacant site. The absence of a W23 vacant site in Figure 1B results from a deletion of the p6 priming site in this inbred. The vacant site was amplified with a combination of p2 and p5 primers (Figure 1A) and 13 clones were sequenced. All had the same number of TA repeats (boxed in blue). The W23 consensus sequence is shown above the line.
